# Supplementary material for: Early childhood neurodevelopmental outcome after open prenatal spina bifida aperta repair
Source: PubMed Central journal article supplement (PMC8596420; doi:10.1111/dmcn.14993), 2021-07-23
Supplement: DMCN-63-1302-s003.pdf [file DMCN-63-1302-s003.pdf]

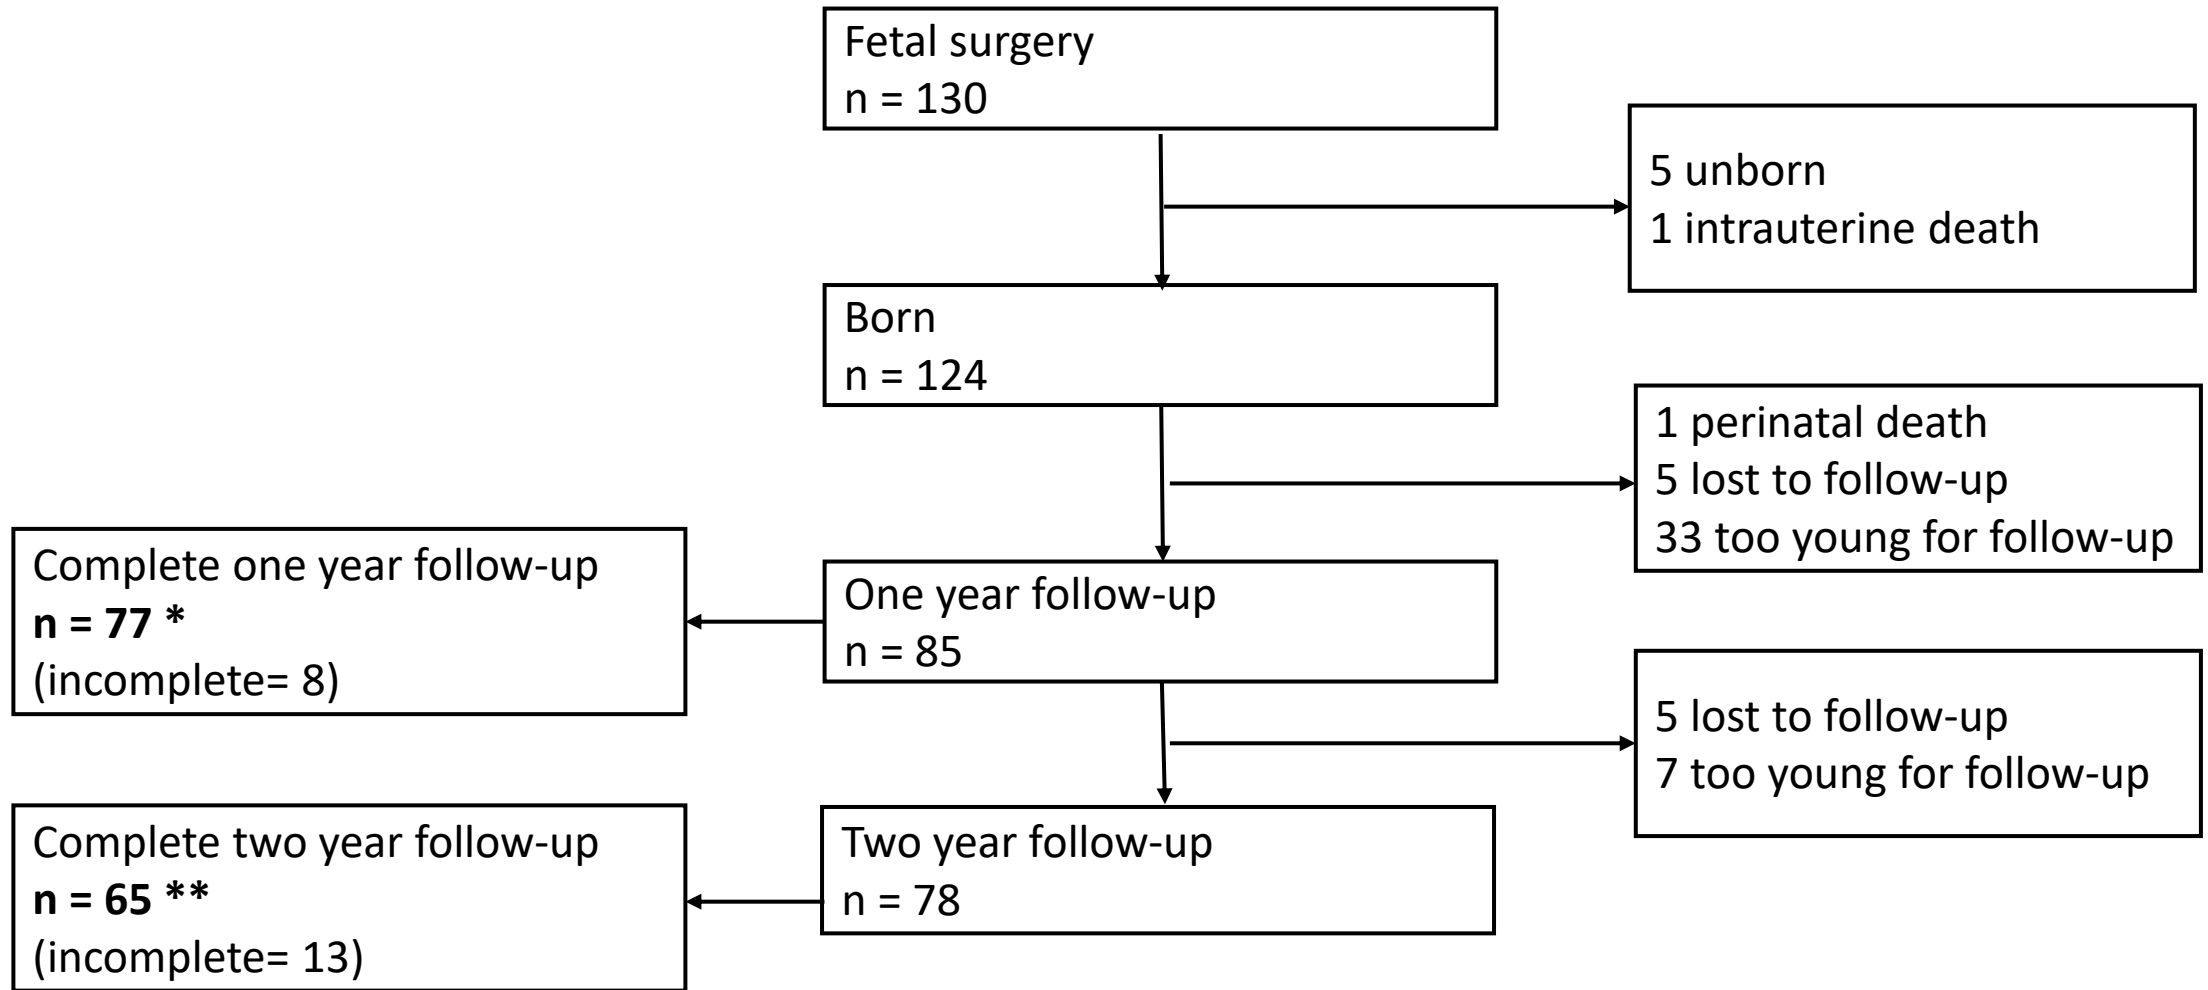

\* December 31, 2019. \*\* September 11, 2020.
